# Supplementary material for: Synthesis, characterization, and polarized luminescence properties of platinum(ii) complexes having a rod-like ligand
Source: Royal Society of Chemistry journal article supplement (doi:10.1039/c2dt30071k), 2012-01-01
Supplement: c2dt30071k.pdf [file c2dt30071k.pdf]

*Electronic Supplementary information for*

**Synthesis, characterization, and polarized luminescence property  
of platinum (II) complexes having a rod-like ligand**

**Takeshi Sato<sup>a\*</sup>, Hiroshi Awano<sup>a</sup>, Osamu Haba<sup>a</sup>, Hiroshi Katagiri<sup>a</sup>,  
Yong-Jin Pu<sup>a</sup>, Tatsuhiro Takahashi<sup>a</sup>, and Koichiro Yonetake<sup>a</sup>**

<sup>a</sup>Graduate School of Science and Engineering, Yamagata University, 4-3-16 Jonan, Yonezawa,  
Yamagata, 992-8510 Japan

\* To whom all the correspondence should be addressed. (Sato)

Phone & Fax: +81-238-26-3047

Email: [twn34755@st.yamagata-u.ac.jp](mailto:twn34755@st.yamagata-u.ac.jp)

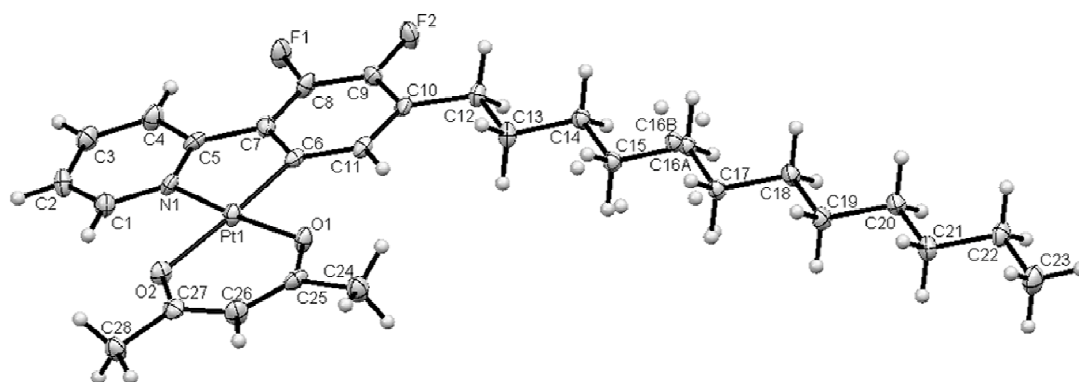

Figure S1 ORTEP drawing of Pt(12F<sub>2</sub>PPy)acac in the single crystal, involving disordered alky chain.

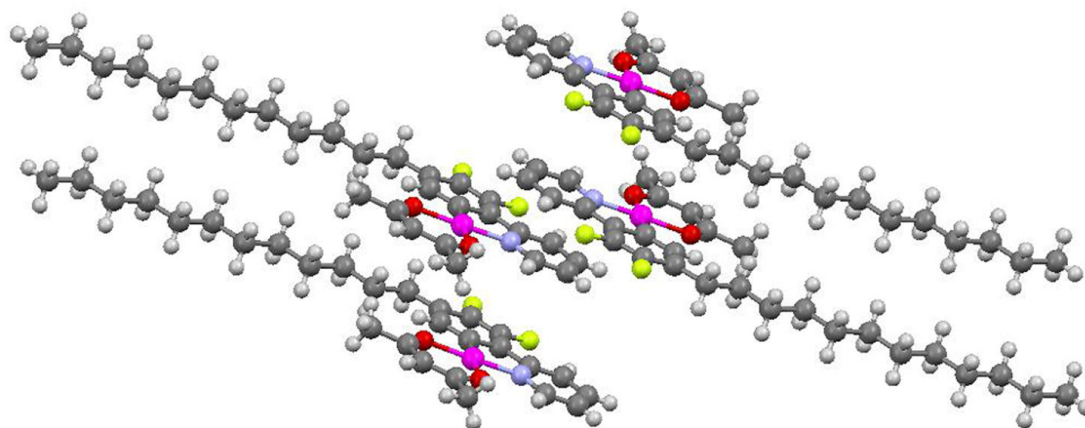

Figure S2 Parallel and anti-parallel packing of dimeric Pt(12F<sub>2</sub>PPy)acac.

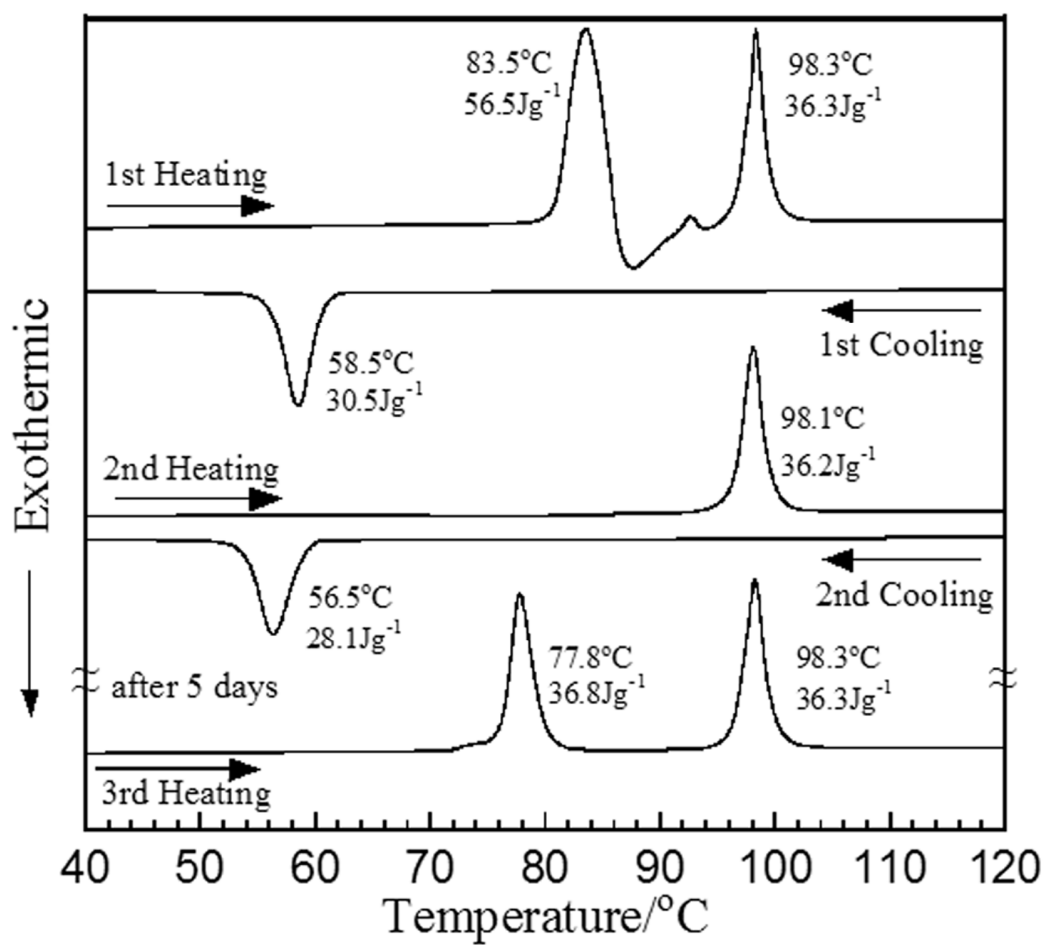

Figure S3 DSC thermograms of Pt(12F<sub>2</sub>PPy)acac.

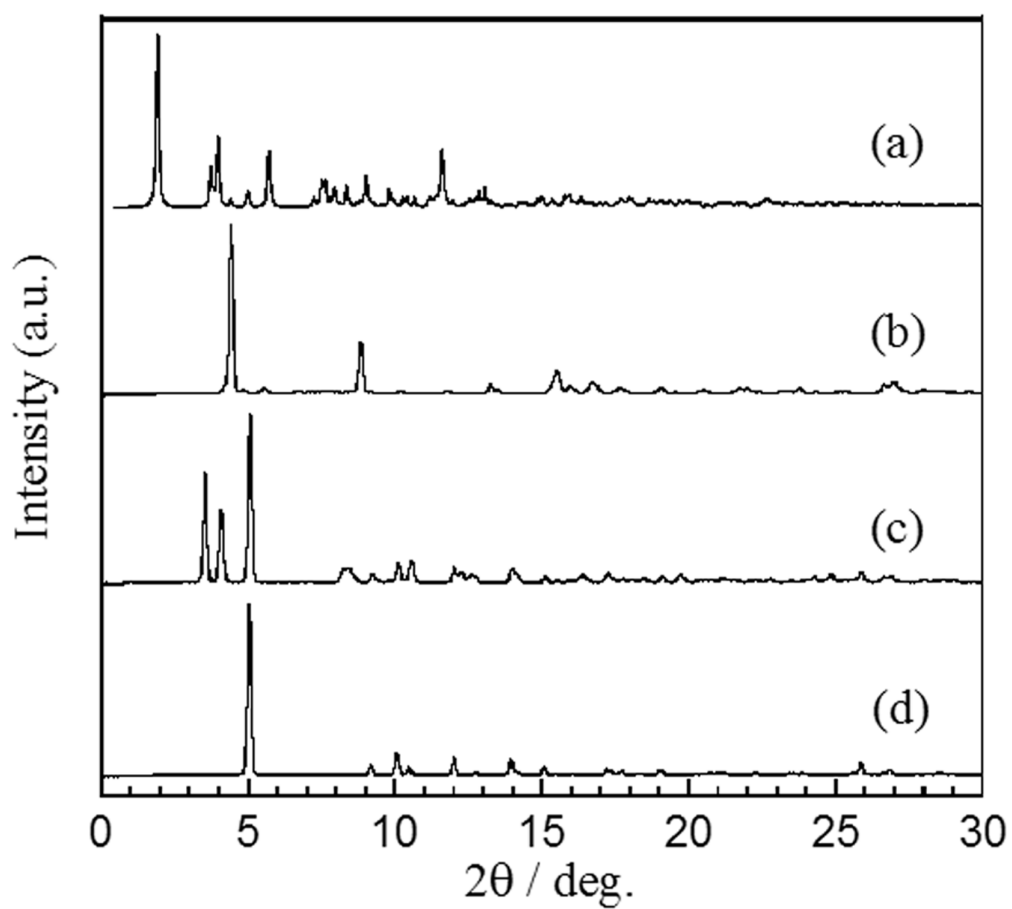

Figure S4 Powder X-ray diffraction patterns of Pt(12F<sub>2</sub>PPy)acac obtained in (a) single crystal, (b) a solid phase cooled from the isotropic phase, (c) after 5 days and (d) at 90 °C on subsequent heating.

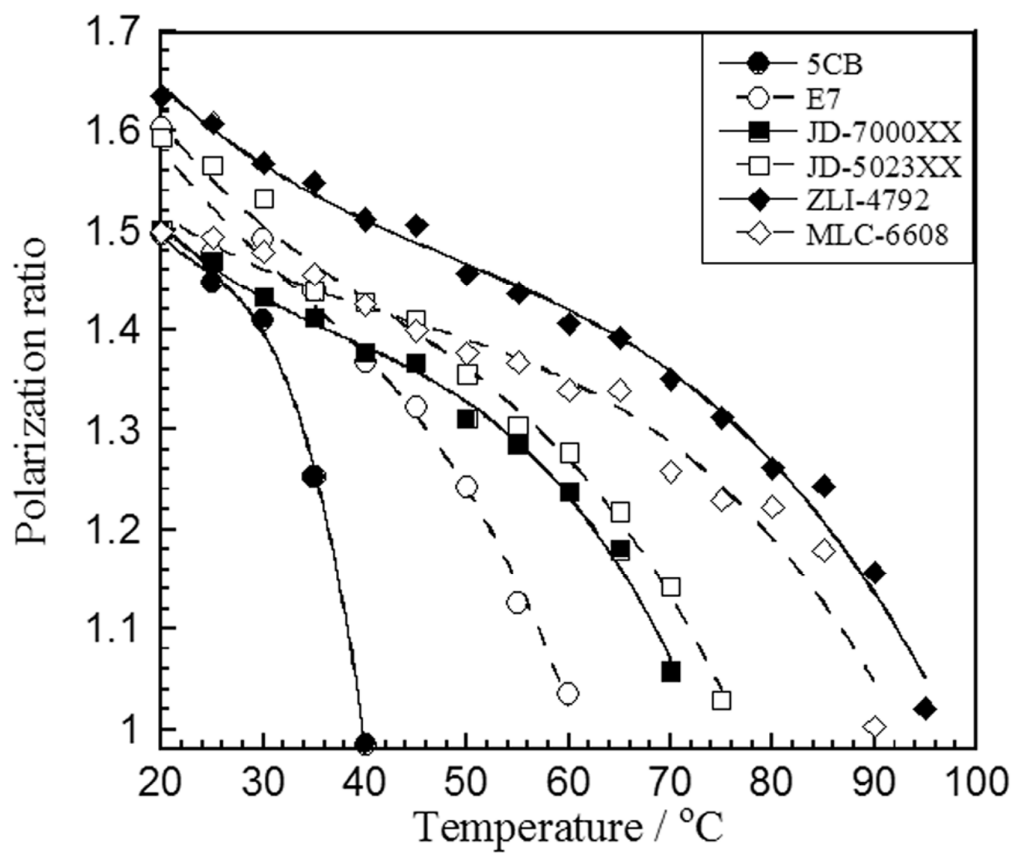

Figure S5 Temperature dependence of polarization ratios of the monomer in  
Pt(12F<sub>2</sub>PPyO<sub>4</sub>)acac/LC mixtures.

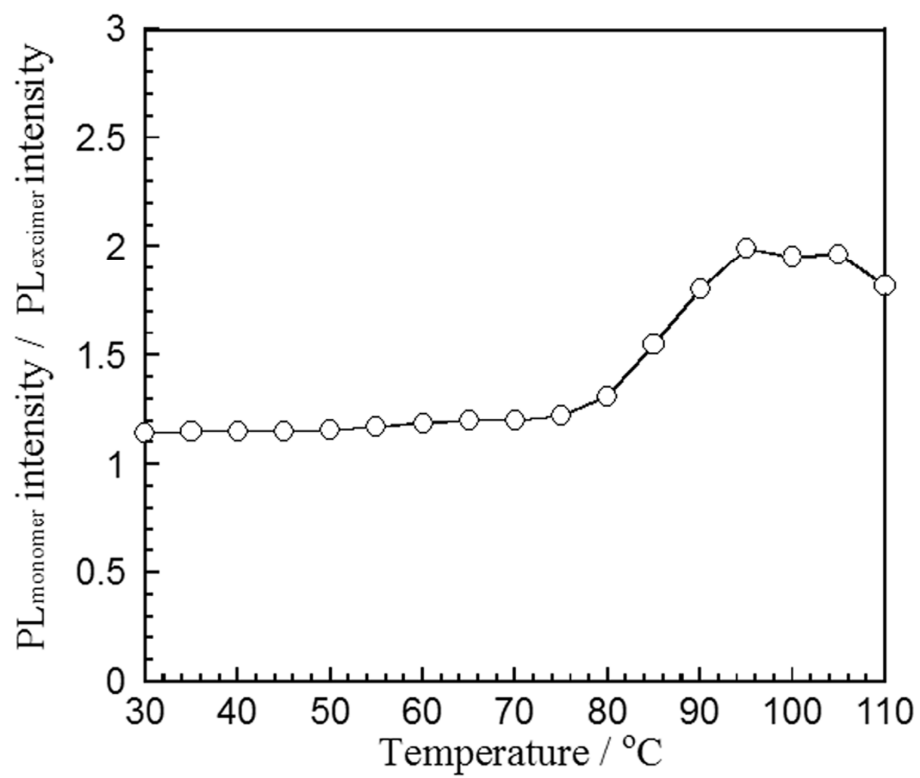

Figure S6 Change in PL intensity ratio of the monomer/the excimer of 20 wt%

Pt(12F<sub>2</sub>PPy)acac doped PMMA film.
